# Supplementary material for: Highly-magnetic mineral protein–tannin vehicles with anti-breast cancer activity
Source: Royal Society of Chemistry journal article supplement (doi:10.1039/d0qm00732c), 2020-12-21
Supplement: d0qm00732c1.pdf [file d0qm00732c1.pdf]

## Supplementary Information

### Highly-magnetic mineral protein-tannin vehicles with anti-breast cancer activity

Received 00th January 20xx,  
Accepted 00th January 20xx

Polina A. Demina,<sup>a</sup> Anatolii A. Abalymov,<sup>a,b</sup> Denis V. Voronin,<sup>a,c</sup> Alexander V. Sadovnikov<sup>a</sup> and Maria V. Lomova<sup>\*a</sup>

DOI: 10.1039/x0xx00000x

**Figure S1** Approximated with the Lorentz peak Brillouin spectra for FIL 1...6 carriers with a) MNP1, b) MNP2.

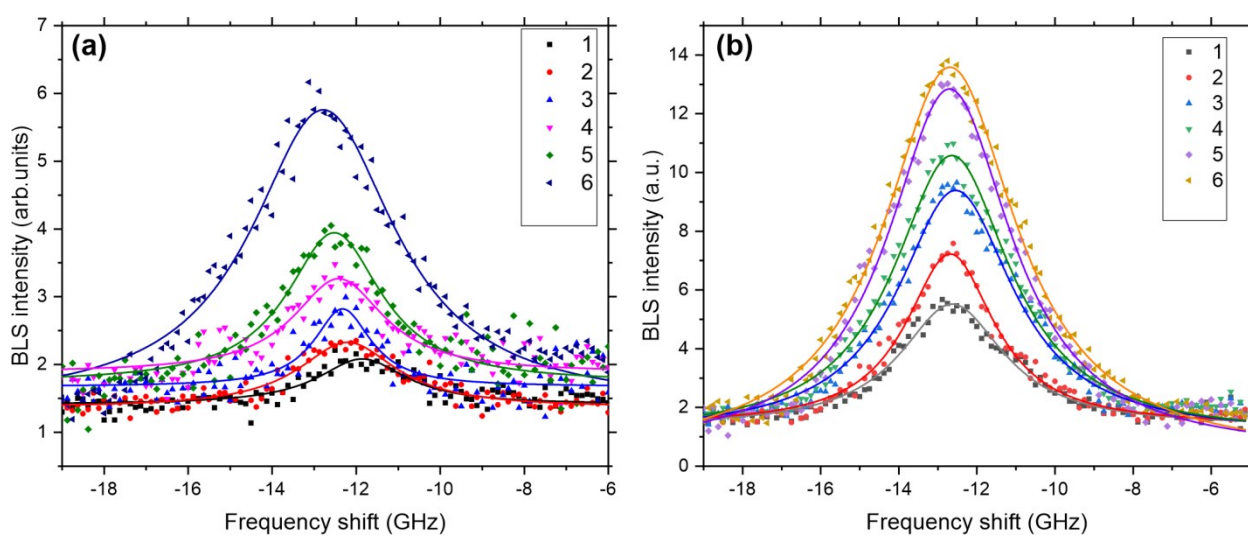

<sup>a</sup> Saratov State University, Astrakhanskaya St. 83, Saratov 410012, Russia.

<sup>b</sup> Dept. of Biotechnology, University of Ghent, Ghent 9000, Belgium.

<sup>c</sup> National University of Oil and Gas «Gubkin University», Leninsky Prospekt 65, Moscow 119991, Russia.

Electronic Supplementary Information (ESI) available: [details of any supplementary information available should be included here]. See DOI: 10.1039/x0xx00000x
